# Provoked cytokine response is not associated with distress or induced secondary hyperalgesia in people with suppressed HIV

Victoria J Madden<sup>1,2</sup>, Luyanduthando Mqadi<sup>1,2</sup>, Gwen Arendse<sup>1</sup>, Gillian J Bedwell<sup>1</sup>, Ncumisa Msolo<sup>1</sup>, Maia Lesosky<sup>3</sup>, Mark R Hutchinson<sup>4,5</sup>, Jonathan G Peter<sup>6,7</sup>, Andrew Schrepf<sup>8</sup>, Romy Parker<sup>1</sup>, Robert R Edwards<sup>9</sup>, John A Joska<sup>2</sup>

<sup>1</sup> African Pain Research Initiative, Department of Anaesthesia and Perioperative Medicine, Neuroscience Institute, University of Cape Town, Cape Town, South Africa

<sup>2</sup> HIV Mental Health Research Unit, Department of Psychiatry and Mental Health, Neuroscience Institute, University of Cape Town, Cape Town, South Africa

<sup>3</sup> National Heart and Lung Institute, Imperial College London, London, UK

<sup>4</sup> School of Biomedicine, University of Adelaide, South Australia, Australia.

<sup>5</sup> Institute for Photonics and Advanced Sensing, University of Adelaide, South Australia, Australia.

<sup>6</sup> Division of Allergy and Clinical Immunology, Department of Medicine, Groote Schuur Hospital, University of Cape Town, Rondebosch, South Africa

<sup>7</sup> Allergy and Immunology Unit, University of Cape Town Lung Institute, University of Cape Town, Cape Town, South Africa

<sup>8</sup> Chronic Pain and Fatigue Research Center, Department of Anesthesiology, Michigan Medicine, University of Michigan, Ann Arbor, Michigan, USA

<sup>9</sup> Department of Anesthesiology, Perioperative, and Pain Medicine, Harvard Medical School, Boston, Massachusetts, USA

## \*Corresponding author

torymadden [at] gmail.com

+27 21 650 3683

## Postal address

D23 Department of Anaesthesia, Groote Schuur Hospital, Anzio Rd, Observatory, 7925, South Africa.

## Funding details

This work was funded by NIH award K43TW011442 to VJM. LM received financial support from a postgraduate scholarship from the University of Cape Town and the National Research Foundation (NRF). GJB was supported by postgraduate scholarships from PainSA, the National Research Foundation (South Africa), and the Oppenheimer Memorial Trust. MRH was supported by an Australian Research Council Future Fellowship (FT180100565). JGP's research work is supported by the EDCTP2 program supported by the European Union (grant number TMA2017SF-1981), National Institute of Allergy and Infectious Diseases of the National Institutes of Health (NIH) under award number R01AI152183, and NIH Fogarty Career development award - K43TW011178. AS is supported by NIH grants R01HD108253 and R01DK123164. RP is supported by the National Research Foundation of South Africa as a rated researcher. RRE was supported by NIH award K24 NS126570.

## Conflicts of interest

VJM, GB, and RP receive payment for lectures on pain and rehabilitation. VJM is an unpaid associate director of the not-for-profit organisation, Train Pain Academy. MRH receives speakers' fees for talks on pain and rehabilitation, is a director of the not-for-profit organisation Australian Pain Research Solution Alliance, Chair of the Safeguarding Australia through Biotechnology Response and Engagement (SABRE) Alliance, a member of the Prime Minister's National Science and Technology Council, and a Director of the Australia's Economic Accelerator Advisory Board. RP is a director of the not-for-profit organisation, Train Pain Academy, and serves as a councillor for the International Association for the Study of Pain. All other authors declare no conflicts of interest related to this work.

**Previous presentation of this work:** The preliminary results were presented in a poster at the 2024 World Congress on Pain, in Amsterdam.

**Page count:** 31

**Figure count:** 3

**Table count:** 1

## Abstract

Psychological distress predicts the onset and worsening of persistent pain, but the mechanisms that underpin this influence are poorly understood. Pro-inflammatory signalling is a plausible mechanistic link, given its known connections to distress, pain, and neural upregulation. Sustained distress may prime the inflammatory system to respond more strongly to a phasic noxious challenge, supporting neuroimmune upregulation of central nociceptive signalling and persistent pain. This cross-sectional study tested the hypotheses that *in vitro* endotoxin-provoked expression of typically pro-inflammatory cytokines (IL1 $\beta$ , IL6) is a partial mediator between distress and persistent pain, and that it is associated with the secondary hyperalgesia response to an experimental noxious challenge, in people with suppressed HIV. Study participants were 99 adults (mean (range) age: 43(28-64y/o; 72 females) with either no pain (n=54) or persistent pain (n=45), mostly of black South African ethnicity, low socio-economic status, and with high social support. The results replicated previous reports that distress is associated with persistent pain status and pain severity, and also showed an association between distress and the anatomical extent of pain. However, distress was not associated with provoked cytokine expression, nor was provoked cytokine

expression associated with secondary hyperalgesia. The conflict between our findings and the evidence on which our hypotheses were based could reflect masking of an effect by differentially trained immune systems or a more complex relationship arising from diverse psychoneuroimmunological interactions in this sample. Our sample's combination of HIV status, African genetic ancestry, financial impoverishment, and rich social interconnectedness is poorly represented in current research and represents an opportunity to deepen insight into psychoneuroimmunological interactions related to distress and persistent pain.

**Keywords:** pain, psychological distress, HIV, hyperalgesia, hypersensitivity, secondary hyperalgesia, cytokines, neuroimmunomodulation, inflammation

## Introduction

People with persistent pain typically report more psychological distress than their pain-free peers. Although there is some reciprocal influence between distress and pain, distress seems to influence pain more strongly than pain influences distress in both population and clinical samples; distress is now a recognised risk factor for developing persistent pain [8; 15; 21; 49; 57; 68; 80]. However, despite the compelling evidence that distress influences pain, there is a lack of clarity about the mechanisms that support this influence.

From a psychological perspective, it seems likely that distress influences pain by biasing the perception of neutral signals as threatening and supporting preferential processing of signals deemed threatening—which would be expected to elicit or exacerbate pain to motivate protective behaviour [26; 27; 39; 55; 89; 92; 100]. However, the influence of distress extends beyond psychological processes to alter both peripheral and spinal immunology. Sustained psychological distress is associated with a subtle increase in tonic pro-inflammatory signalling that is thought to confer a propensity for a heightened inflammatory response — an elevated “inflammatory reactivity”—in response to a phasic challenge, such as psychosocial or physical trauma [22; 65; 83]. Experimental immune provocation, with agents such as endotoxin, models the expression of inflammatory cytokines and chemokines in response to a standardised phasic challenge, allowing insight into this inflammatory reactivity.

Inflammatory signalling has been linked to pain in both clinical samples and healthy controls. Elevated *in vitro* inflammatory reactivity (i.e. stronger innate inflammatory response to immune challenge) in peripheral blood is associated with clinical pain [45; 77-79] and other clinical conditions that feature pain [42; 43]. PET-detected markers of central nervous system astrocyte activation are associated with low back pain and fibromyalgia, as well as negative affect [1; 2; 51]. The extensive neuroimmune interactions within the central nervous

system may explain this. In healthy controls, intravenous endotoxin exposure potentiates capsaicin-induced hyperalgesia and allodynia, indicating a priming effect of inflammation on pain, likely through heterotopic spinal facilitation of nociception [30]. Together, these data connect inflammatory signalling, nociceptive processing, and pain, but two questions remain unanswered: what influences inflammatory reactivity, and what are the consequences of inflammatory reactivity?

The current study initiates a new line of mechanistic inquiry by directly testing psychoneuroimmune mechanisms that may underpin persistent pain in people with suppressed HIV. HIV is a chronic infectious disease with elevated co-burdens of both distress and persistent pain [20; 54; 64; 69]. This study builds on three main pieces of previous evidence in people with HIV: first, distress and pain may fluctuate together [60; 81]; second, that distress and persistent pain are each associated with elevated expression of inflammatory signalling proteins [19; 22; 61]; and, third, that inflammatory signalling is associated with HIV-associated neuropathic pain [82]. We hypothesised that sustained distress primes the inflammatory system to respond more strongly to a noxious challenge (i.e. distress raises inflammatory reactivity, IR), with knock-on priming effects on central nociceptive signalling. To this end, we tested two hypotheses: (1) that IR would explain part of the association between distress and persistent pain, and (2) that IR would be positively associated with neural reactivity (i.e. stronger heterotopic facilitation in response to neural challenge, represented by induction of secondary hyperalgesia).

## **Methods**

### **Study overview**

This cross-sectional analysis uses data collected at the baseline time point (pre-designated as primary) in a longitudinal study. The data were provided by adults with HIV suppressed by antiretroviral therapy, who provided self-reported data on distress, pain, and potential

confounder/collider variables, and blood samples to one assessor ('Assessor 1').

Participants' medical records were reviewed for clinical data. A subsample of participants also underwent experimental induction and assessment of secondary hyperalgesia (SH) on a pain-free forearm, with a second assessor ('Assessor 2'). The Human Research Ethics Committees of the University of Cape Town and City of Cape Town (approvals 764/2019 and 24699) approved the study. The study protocol specified the two *a priori* hypotheses and the analysis approach (including planned comparisons and threshold for statistical significance) and was peer-reviewed and published before data review [56], and the study was registered at [clinicaltrials.gov](https://clinicaltrials.gov) (NCT04757987). All deviations from the published protocol are reported in the supplementary file, and analysis scripts are available at Open Science Framework at [tinyurl.com/distress-pain](https://tinyurl.com/distress-pain).

## Blinding

Participants and Assessor 1 were blind to the study aims and hypotheses; Assessor 2 was blind to participant reports on distress levels and pain; one analyst (ML) was blinded to participant pain status for testing of Hypothesis 2 (details in supplementary file). For the SH procedure, blinding of participants and Assessor 2 was tested.

## Participants

Adults living with HIV who attended a particular primary healthcare facility in a peri-urban settlement near Cape Town, South Africa – a setting with high levels of unemployment, low income, and informal housing characteristic of poverty [85] – were recruited to participate in the study. Inclusion criteria are in Box 1.

| Applicable to all participants:            |
|--------------------------------------------|
| Participants $\geq 18$ and $\leq 65$ years |
| Speaks English or isiXhosa                 |

|                                                                                                                                                                            |
|----------------------------------------------------------------------------------------------------------------------------------------------------------------------------|
| HIV positive with virus suppression ( <i>viral load &lt; 50 copies/ml within preceding 3 months</i> )                                                                      |
| Self-reported persistent pain (pain on most days for more than three months [5]) or no pain                                                                                |
| Not pregnant (self-reported)                                                                                                                                               |
| Competent to autonomously provide informed consent (assessed using explain-and-explain-back provision of study information) and able to engage in screening questionnaires |
| No neurological (self-reported) or psychiatric problems including substance abuse, psychosis, or suicide risk (screened)                                                   |
| <b>For subsample for SH induction:</b>                                                                                                                                     |
| No electrical or metal implant, or current pain, in the forearm to be tested (self-report)                                                                                 |
| No tattoos or problems with sensation on the forearm to be tested                                                                                                          |
| Not advised by a clinician to avoid stressful conditions (self-report)                                                                                                     |

**Box 1:** Inclusion criteria

We aimed to recruit participants into two equally sized groups defined by pain status: one group of participants reporting no pain, the other reporting persistent pain. Individuals reporting transient or recent-onset pain were not eligible. Participants were frequency-matched across the groups on sex and age (within 5 years). Therefore, using non-probability convenience sampling, each person expressing interest in the study was screened for eligibility. Those who met the pain-related inclusion criteria were compared to the group requirements for matching. A pragmatic approach pre-determined 50 participants for each group. Consecutive eligible participants were invited to a subsample to also undergo the induction and assessment of SH, subject to additional eligibility criteria for participant safety (Box 1). Of the 50 in each group, we aimed to recruit 30 into the subsample.

## **Procedure**

### **Consent, blood draws, and self-report questionnaires**

Using either English or isiXhosa (as chosen by the volunteer), Assessor 1 explained the study information to interested and eligible volunteers. An explain-and-explain-back approach was used to identify any cognitive difficulties and to confirm comprehension of the study procedures. After obtaining written consent, Assessor 1 used a single venepuncture to draw two blood samples and then administered the self-report questionnaires. On completion of this assessment, each participant received a ZAR150 (US\$10) cash voucher. Subsample participants were given an appointment with Assessor 2 (on the same or a subsequent day).

### **Handling of blood samples**

One blood sample was stimulated with endotoxin in an ex vivo closed system (TruCulture, MyriadRBM), incubated at 37 °C for 24 hours, separated, and frozen at -20 °C for 10-32 days, and then stored at -80 °C. A second, unstimulated sample was spun and separated, and frozen for future use. Details are in the supplementary file. All stimulated samples were assayed in duplicate (R&D 3-plex Discovery assay) at a dilution factor of 1:30, using Luminex xMAP technology, to quantify the concentration of IL1 $\beta$ , IL6 and TNF $\alpha$ .

### **SH procedures for the subsample**

Immediately before the SH procedure, Assessor 2 orientated and prepared the participant, obtained verbal confirmation of consent, and attached specialised electrodes (circular cathode of 10 blunt steel pins on anterior forearm; fabric anode around the upper arm). The SH procedure is shown in Figure 1. A test battery is used to assess surface area and magnitude of SH. For the post-induction test batteries only, surface area is assessed first, with a 128mN Von Frey filament (Marstock nervtest, Germany) and the 8-radial-lines method



[74]. For all test batteries, five other stimulus modalities are used in a consistent order: for punctate mechanical stimuli, 128mN and 256mN blunt pinpricks (PINPRICK, MRC systems, Heidelberg, Germany); a single electrical stimulus; for dynamic light touch, a 1-second brushing stroke from a paintbrush (Prime Art Bianco Flat 16); for static light touch, a 32mN Von Frey filament. The pinprick data are used to determine the magnitude of SH; the other modalities are not reported here.

\*\*\* Figure 1 approximately here \*\*\*

On completion of the SH procedure, Assessor 2 and the participant completed blinding assessments (details in supplementary file) and a brief semi-structured feedback discussion. Subsample participants were compensated with an additional ZAR150 (US\$10).

## Outcomes

The main study outcomes were distress, persistent pain severity, count of persistent pain sites, provoked cytokine expression, and the surface area and magnitude of SH.

Symptoms of psychological distress were assessed with both the Hopkins 25-item Symptom Checklist (HSCL) and the World Health Organisation's 20-item Self-Report Questionnaire (SRQ-20). The HSCL was the primary measure of distress for this study because it has been used in prior research in people living with HIV in South Africa [37; 38; 98], whereas the SRQ-20 has been used in samples from the general population of South Africa [25; 86].

Persistent pain severity and sites were assessed with an adapted version of the Brief Pain Inventory (BPI) [63]. Question sets were used to assess pain in the past week and persistent pain separately; participants provided manual ratings on the VAS and shaded the body map manually. VAS ratings were coded to lie between 0 and 10; shading of the BPI body map was coded into 18 different areas (any shading within an area constituted endorsement) and transcribed to the electronic database.

Provoked expression of IL6, IL1 $\beta$ , and TNF $\alpha$  in whole blood was used to capture IR. Of these analytes, only IL6 and IL1 $\beta$  had been specified *a priori*; funding unexpectedly also allowed analysis of TNF $\alpha$ , so we report those results here. We specifically used whole blood, rather than a line of isolated cells, to allow for the influences of and interactions between large cell components (e.g. T-cells) and smaller cells (e.g. peripheral blood mononuclear cells). Although this outcome is traditionally considered to capture the peripheral inflammatory response, it reflects central responses well enough to provide a 'window' into central inflammatory responses [46].

SH was assessed using both surface area (in cm<sup>2</sup>) and ratings. For ratings, participants rated each stimulus by swiping a stylus pen across a screen showing a vertical touch-VAS (anchors: 0 = 'no pain'; 100 = 'pain as bad as you can imagine') [53]. The bar on the VAS filled up with red to the participant's swipe point, to give visual feedback (Figure 1).

### **Adjustment variables**

For Hypothesis 1, eight potential adjustment variables were assessed. Viral load, nadir CD4 count, type of antiretroviral therapy (ART), and other medications (including analgesia) were obtained from participants' routine medical records, wherever available. When viral load results were unavailable, they were assessed as part of the study processes. Participants also self-reported medications used and known comorbidities from the three months preceding the study, including symptoms of tuberculosis and any other co-infections. The time of the blood draw was included as a covariate in all models that included IR [76; 94]. Other variables assessed were childhood trauma (28-item childhood trauma questionnaire short form, CTQ-SF), social support (Medical Outcomes Study social support survey), and stressful life events in the 12 months preceding the study (21-item Brugha Recent Life Events Scale) [56].

For Hypothesis 2, the analysis controlled for both the induction current and the VAS ratings of the five induction trains, given the current uncertainty about whether induced SH depends in part on the current used for the induction, or the subjective percept elicited by the induction procedure itself.

## Data management

Questionnaire and medical record data were captured directly into the institutional RedCap database. SH procedure data were recorded into Affect5 [84] and an Excel spreadsheet. All data were coded with a unique participant ID and stored securely. Questionnaire-based and medical data were checked for plausibility and completeness by two assessors. Errors and omissions were addressed, completed data retained, and records kept of all additions or corrections made to the data.

## Statistical analysis

### Data handling

The de-identified data from RedCap, Affect5 and Excel were tidied and analysed in the R statistical environment version 4.3.2 (R Foundation, Vienna, Austria) [70] using RStudio version 2023.12.0+369 [88], using a private, password-protected GitHub repository. Data were visualised and described using median with 25<sup>th</sup> and 75<sup>th</sup> quartiles (Q1, Q3) or frequency (proportions) for numerical and categorical variables, respectively. The main R packages we used were: arsenal v. 3.6.3 [28], boot v. 1.3.28.1 [14; 17], brms v. 2.21.0 [11-13], cmdstanr v. 0.8.1 [23], epiR v. 2.0.67 [87], flextable v. 0.9.4 [87], glmmTMB v. 1.1.9 [7], lme4 v. 1.1.35.1 [3], lmeresampler v. 0.2.4 [52], lmerTest v. 3.1.3 [44], mediation v. 4.5.0 [31-35; 90], PerformanceAnalytics v. 2.0.4 [67], tidybayes v. 3.0.6 [40], and tidyverse v. 2.0.0 [97]. A full list of R packages used is provided in the analysis scripts.

Pain status was determined separately at screening and at the baseline study time point.

Because some participants had a time delay between these two events, we excluded from the analysis any participant with conflicting pain status information between screening and data collection (Figure S1). To estimate cytokine levels, we fitted a weighted quadratic model to define the standard curve and used the raw fluorescence values to interpolate estimates for samples that fell outside the assay's expected range (details in supplementary file).

### **Validity checks**

To test our assumption that the HSCL would yield a reasonable estimate of psychosocial distress, we assessed its agreement with the SRQ-20 using a Bland-Altman plot and Lin's concordance correlation coefficient (CCC) [47; 48; 95](details in supplementary file).

To test whether SH was successfully induced, we constructed a mixed effects regression model with rating as the dependent variable and time of the assessment relative to the induction (coded as before/after) as the fixed independent variable. We allowed a random intercept with nesting of modality (128/256mN) within time (0, 30, 34, 60mins), and time within individual. A main effect of assessment time (indicating higher ratings after the induction than before the induction) would confirm successful induction of SH. We used zero-inflated beta regression to accommodate the high number of zeros in the data and the boundaries of the rating scale (details in supplementary file) [6; 101].

### **Planned hypothesis tests**

Using data from only the persistent pain group, we first modelled the relationship between distress and each measure of persistent pain to understand this direct effect. To test whether IR mediates part of the relationship between distress and persistent pain, we conducted two cross-sectional mediation analyses for each of the 3 cytokines. We estimated the direct and indirect associations between distress (exposure) and pain severity or number of pain sites (outcome), with cytokine expression as the putative mediator.

To test whether IR was positively associated with induced SH, we used generalised mixed effects models with cytokine expression and group as independent variables. For the magnitude measure of induced SH, rating was the dependent variable. Ratings had been provided for two different stimulus weights at four different time points (before induction; 30, 45, 60 minutes after induction). The time of the assessment relative to the induction (coded as before/after) was included as a fixed independent variable. We allowed a random intercept with nesting of modality (128/256mN) within time (0, 30, 34, 60mins), and time within individual. A significant interaction between assessment time and cytokine expression would support the hypothesised association. Again, zero-inflated beta regression was used. For the surface area measure of induced SH, area was the dependent variable. The fixed independent variable of interest was the expression of the cytokine of interest, and the random intercept term specified that assessment time was nested within individual. To accommodate the high number of zeros in the data, the lack of any upper bound on the surface area of SH, and the non-parametric distribution of the data, we used a hurdle lognormal model in the 'brms' package [9; 10], which applies Bayesian principles to modelling.

In all cases, we report both unadjusted and covariate-adjusted models, as well as effect sizes and 95% confidence intervals (CI) or credible intervals.

### **Post-hoc, exploratory analyses**

To assess whether participants who withdrew had different distress severities, we used the data from all eligible participants who had commenced the SH procedure and plotted distress against procedure completed status (withdrew or completed).

## Results

### **Most participants were female, low-SES, black-ethnicity South Africans**

In-person assessments for the current analysis were undertaken from 11 February 2021 to 24 November 2021; the longitudinal follow-ups and medical record review continued thereafter. From the 131 volunteers who were formally screened for eligibility (see flowchart in Figure S1), data from 99 participants (72 female; median (range) age: 42 (28-64) years old) were included. There were no missing data from any of the self-reported outcomes, except three items were missing from the MOS-SSS for all participants (details in supplementary file).

Table S1 provides full demographic and economic details. All participants identified with black ethnicity; most were South African citizens ( $n = 98$ ), spoke isiXhosa as their home language ( $n = 95$ ), and had children ( $n = 97$ ; median of 2 children each). The mean monthly income per person within each household was ZAR797 (approx. US\$54). Most participants ( $n = 59$ ; 60%) were unemployed, and the most common housing type was informal housing ( $n = 48$ ), closely followed by own or family housing ( $n = 43$ ).

A total of 47 participants (33 female; median (range) age: 41 (30-64) years old) completed the SH procedure. Five participants had withdrawn, citing the painfulness of the HFS. Data from two subsample participants were excluded for epilepsy (details in supplementary file); we report data from the remaining  $n = 45$ . One participant had been advised to avoid stressful events but enrolled on clinical judgement; their data were retained (see supplementary file). Self-report data for the subsample ( $n = 45$ ) were not significantly different from the remainder ( $n = 54$ ) (Table S2).

## Participants with persistent pain had higher distress, more adverse childhood experiences, moderate-severity, and multisite pain

Table 1 compares self-reported data between pain status groups. Psychosocial distress was higher in the persistent pain group (n = 45; median (Q1, Q3): 1.8 (1.4, 2.3)) than in the pain-free group (n = 54; 1.3 (1.1, 1.6)), Wilcoxon  $p < 0.001$ ). Similarly, childhood trauma was higher in the persistent pain group (34 (28, 47)) than in the pain-free group (30 (25, 39.8)),  $p < 0.05$ ). There were no between-group differences in scores for stressful life events or social support. Median (Q1, Q3) persistent pain severity score was 5.2 (4.4, 6.0) and the median number of sites of persistent pain was 3 (2, 6) (for n = 45).

Cytokine levels fell outside the ranges of the assay for 38 (of 99) samples for IL6, 1 sample for IL1 $\beta$ , and 2 samples for TNF $\alpha$ , and were interpolated as described above. Cytokine concentration did not differ between groups (Table 1).

The median (IQR) current used for HFS was 0.1mA (0.1, 0.2) and was not statistically different between groups (Table 1). Ratings were missing for 119 of 225 HFS trains, due to technical error, and were imputed using the median of the available ratings for the relevant train (details in supplementary file). The group with persistent pain reported higher ratings to pinprick stimulation than the pain-free group at only the baseline time point (7.5 (0.7, 22.7) vs 1.0 (0.3, 3.4),  $p = 0.046$ ) (Table S3). Neither the magnitude nor the surface area of HFS-induced SH differed between groups (Table S3). Figure 3b and 3c show pinprick ratings and SH area by time.

|                                             | pain-free (N=54) | persist-pain (N=45) | Total (N=99) | p value           |
|---------------------------------------------|------------------|---------------------|--------------|-------------------|
| <b>HSCL overall</b>                         |                  |                     |              | <b>&lt; 0.001</b> |
| Sample n                                    | 54               | 45                  | 99           |                   |
| Median                                      | 1.3              | 1.8                 | 1.4          |                   |
| Q1, Q3                                      | 1.1, 1.6         | 1.4, 2.3            | 1.2, 2.1     |                   |
| Range                                       | 1.0 - 2.5        | 1.1 - 3.4           | 1.0 - 3.4    |                   |
| <b>Provoked IL-1beta expression (pg/mL)</b> |                  |                     |              | <b>0.773</b>      |

|                                                        | pain-free (N=54) | persist-pain (N=45) | Total (N=99)     | p value |
|--------------------------------------------------------|------------------|---------------------|------------------|---------|
| Sample n                                               | 54               | 45                  | 99               |         |
| Median                                                 | 7131.9           | 7381.3              | 7309.5           |         |
| Q1, Q3                                                 | 4496.5, 12396.8  | 5101.5, 10114.0     | 4732.4, 10968.8  |         |
| Range                                                  | 381.7 - 32421.1  | 737.8 - 19856.7     | 381.7 - 32421.1  |         |
| <b>Provoked IL-6 expression (pg/mL)</b>                |                  |                     |                  | 0.441   |
| Sample n                                               | 54               | 45                  | 99               |         |
| Median                                                 | 21044.9          | 21810.9             | 21110.6          |         |
| Q1, Q3                                                 | 15536.3, 31326.6 | 16783.4, 31912.0    | 16462.7, 31501.5 |         |
| Range                                                  | 224.3 - 32140.5  | 3105.8 - 32140.5    | 224.3 - 32140.5  |         |
| <b>Provoked TNF-alpha expression (pg/mL)</b>           |                  |                     |                  | 0.267   |
| Sample n                                               | 54               | 45                  | 99               |         |
| Median                                                 | 4100.2           | 3243.9              | 3580.2           |         |
| Q1, Q3                                                 | 2835.1, 5554.5   | 2437.4, 5083.2      | 2716.4, 5475.9   |         |
| Range                                                  | 14.7 - 7936.4    | 656.0 - 11166.6     | 14.7 - 11166.6   |         |
| <b>Count of pain sites</b>                             |                  |                     |                  |         |
| Sample n                                               | 0                | 45                  | 45               |         |
| Median                                                 | NA               | 3.0                 | 3.0              |         |
| Q1, Q3                                                 | NA               | 2.0, 6.0            | 2.0, 6.0         |         |
| Range                                                  | NA               | 1.0 - 11.0          | 1.0 - 11.0       |         |
| <b>Persistent pain severity</b>                        |                  |                     |                  |         |
| Sample n                                               | 0                | 45                  | 45               |         |
| Median                                                 | NA               | 5.2                 | 5.2              |         |
| Q1, Q3                                                 | NA               | 4.4, 6.0            | 4.4, 6.0         |         |
| Range                                                  | NA               | 2.6 - 8.2           | 2.6 - 8.2        |         |
| <b>Persistent pain interference (in the past week)</b> |                  |                     |                  |         |
| Sample n                                               | 0                | 45                  | 45               |         |
| Median                                                 | NA               | 5.0                 | 5.0              |         |
| Q1, Q3                                                 | NA               | 4.1, 6.0            | 4.1, 6.0         |         |
| Range                                                  | NA               | 1.3 - 9.6           | 1.3 - 9.6        |         |
| <b>CTQ (SF) total</b>                                  |                  |                     |                  | 0.041   |
| Sample n                                               | 54               | 45                  | 99               |         |
| Median                                                 | 30.0             | 34.0                | 31.0             |         |
| Q1, Q3                                                 | 25.0, 39.8       | 28.0, 47.0          | 27.0, 41.0       |         |
| Range                                                  | 25.0 - 96.0      | 25.0 - 101.0        | 25.0 - 101.0     |         |
| <b>Brugha stressful live events scale</b>              |                  |                     |                  | 0.662   |
| Sample n                                               | 54               | 45                  | 99               |         |
| Median                                                 | 3.0              | 3.0                 | 3.0              |         |
| Q1, Q3                                                 | 2.0, 4.0         | 2.0, 4.0            | 2.0, 4.0         |         |
| Range                                                  | 0.0 - 9.0        | 0.0 - 7.0           | 0.0 - 9.0        |         |
| <b>MOS social support survey</b>                       |                  |                     |                  | 0.186   |
| Sample n                                               | 54               | 45                  | 99               |         |
| Median                                                 | 4.9              | 4.8                 | 4.8              |         |
| Q1, Q3                                                 | 4.4, 5.0         | 3.9, 5.0            | 4.2, 5.0         |         |
| Range                                                  | 2.1 - 5.0        | 2.0 - 5.0           | 2.0 - 5.0        |         |
| <b>Current used for HFS (mA)</b>                       |                  |                     |                  | 0.827   |
| Sample n                                               | 28               | 19                  | 47               |         |
| Median                                                 | 0.2              | 0.1                 | 0.1              |         |
| Q1, Q3                                                 | 0.1, 0.2         | 0.1, 0.2            | 0.1, 0.2         |         |
| Range                                                  | 0.0 - 0.3        | 0.0 - 0.3           | 0.0 - 0.3        |         |

Table 1: Outcomes by study group. P-values based on Wilcoxon tests. HSCL: 25-item Hopkins Symptom

Checklist; CTQ (SF): Childhood Trauma Questionnaire Short Form; MOS: Medical Outcomes Survey; HFS: high-frequency electrical stimulation.



## **HSCL scores of distress showed good agreement with SRQ-20 scores**

The Bland-Altman plot and concordance correlation coefficient showed good agreement between the estimates of distress yielded by the HSCL tool and those from the SRQ-20 tool (Figure S2 and details in supplementary file).

## **Planned analyses**

ART regimen, comorbidities, and other medication could not be meaningfully included as adjustment variables, because most of the sample was on first-line ART and there were too few and various comorbidities and other medications reported. The adjustment variables included in the models were: childhood trauma, stressful life events, social support, age, and sex.

## **Distress was associated with pain, but not with IR**

Distress was positively associated with both pain measures in both unadjusted and covariate-adjusted models (adjusted models shown in Figures 2a and 2b). On average, a 1-point increase in distress (on the scale with range 1-4) was associated with an increase in persistent pain severity of ~0.8 points (unadjusted coefficient (95%CI): 0.8 (0.20-1.43),  $p = 0.010$ ; adjusted 0.8 (0.18-1.47),  $p = 0.013$ ) on a 0-10 scale, and two more sites of pain (unadjusted coefficient (95% CI): 2.2; (0.90-3.56),  $p = 0.002$ ; adjusted 1.8 (0.16-3.42),  $p = 0.032$ ) of a possible total of 18 sites. This direct association was replicated in each mediation model. Importantly however, there was no evidence to reject the null hypothesis in support of an association between distress and inflammatory reactivity (the hypothesised mediator) (Figure 2c) for any of the 3 cytokines tested. Therefore, there was no evidence that inflammatory reactivity mediated the relationship between distress and either measure of persistent pain.

\*\*\* Figure 2 approximately here \*\*\*

## **Induced secondary hyperalgesia was not associated with IR**

SH was successfully induced (Figure S2): both the unadjusted and adjusted zero-inflated beta regression models showed a main effect of assessment time on rating in the zero-inflated model portions only ( $p < 0.001$ ). Neither portion of the unadjusted nor adjusted regression models for the rating outcome indicated a statistically significant interaction between assessment time and cytokine expression score (Figure 3). Neither portion of the unadjusted nor adjusted hurdle models for area of SH indicated a main effect of cytokine expression score: the 95% credible intervals included zero in every case. Therefore, there was insufficient evidence to identify any association between cytokine expression score and either measure of induced SH.

\*\*\* Figure 3 approximately here \*\*\*

## **Exploratory analysis**

Visualisation suggested no obvious difference in distress between subsample participants who withdrew and participants who completed the procedure (Figure S4).

## **Discussion**

We tested whether inflammatory reactivity partly mediates the relationship between distress and pain in people with virally suppressed HIV. We confirmed an association between distress and three measures of pain: distress was greater in participants with persistent pain than in participants with no pain, and distress was positively associated with both severity and extent of persistent pain. However, we found no evidence of an association between distress and inflammatory reactivity, as captured by endotoxin-stimulated expression of IL1 $\beta$ , IL6, and TNF $\alpha$  in whole blood. The association between distress and both pain status and pain severity aligns with previous findings in the general population and a small literature in people with HIV [62; 73; 80]. In contrast to pain status and severity, few studies have focused on pain extent. In previous cross-sectional work in people with HIV in Britain and

Ireland, widespread pain was more common in people with HIV than in people without HIV.

The remaining prior data come from studies in the general population that have found a similar linear relationship between distress and pain extent as found in our sample of people with HIV [36; 58; 91]. That distress is robustly associated with persistent pain, and that both compromise wellbeing, suggests that people presenting with one should also be offered assessment and treatment for the other.

The lack of evidence for an association between distress and inflammatory reactivity in our data is intriguing, and raises the possibility that distress has a different relationship to innate immune activity in our participants, than in participants in the prior research on which we based our hypotheses. There is a marked paucity of data on pain-related psychoneuroimmune interactions in people with virally suppressed HIV, in people with Southern African genetic ancestry, and in people with social and economic circumstances that reflect those of our participants. Serological suppression of HIV is unable to eliminate the virus from certain central and peripheral tissues [18], and this residual virus is known to elevate inflammatory signalling [75], raising the possibility that inflammatory responses have distinct features—potentially supporting distinct psychoneuroimmune interactions—in people with suppressed HIV. With respect to genetic ancestry, our sample comprised predominantly amaXhosa people. Although innate immune function is known to vary with genetic ancestry and environment, and these variations include the Toll like receptor4 cascade that is recruited by endotoxin, their relevance to clinical pain remains unclear for people with Southern African genetic ancestry [29; 93]. It is possible that the combination of HIV disease status and Southern African genetic ancestry brings distinct features to the relationship of innate immune function to distress. Social and economic circumstances may also be relevant: our participants had significant financial and food insecurity, yet high perceived social support. Given that social support is already known to buffer the immune effects of childhood adversity [72], it seems plausible that social support could also buffer the effects of distress such that, while participants continue to notice symptoms of distress, social support

attenuates a lasting influence of distress on innate immune function. We theorise that normative validation may be central to this attenuation. Some of the most salient sources of distress for this sample—financial and food uncertainty, employment concerns—would be common to much of their community. Supportive interpersonal interactions and shared suffering may serve to validate distress and raise a person’s sense of interpersonal safety, thus reducing the immunological drive to protect that would otherwise be expected to be raised by distress. Interestingly, the interpersonal origin of this sense of safety may restrict its effects to inflammatory reactivity without reducing the effect of distress on neural reactivity, which is typically increased in response to threat to bodily tissue. More research amongst people with richly interpersonal cultures will be useful to test and refine these ideas.

A competing possibility is that the hypothesised relationships do indeed exist in this sample, but are ‘masked’ by other sources of variance. The most obvious source of variance is lifetime training of innate immunity, for example by factors such as latent tuberculosis, BCG vaccination, and environmental mycobacteria or fungal exposures, which were not measured but are common exposures in the context of this study. Testing this would require detailed information on diverse lifetime exposures.

The current study’s second aim was to test the association between IR and pain-related neural reactivity in people with HIV who had either persistent clinical pain or no clinical pain. We found no evidence for an association between IR and induced SH, which is also surprising in light of the close interactions between inflammatory and nociceptive processes in the central nervous system. One possibility is that concordance between inflammatory activity in the peripheral and central nervous systems is specific to conditions of neural injury or *in vivo* inflammation. Peripheral blood immune activity has been shown to reflect spinal and brain immune processes that sustain persistent pain [24; 46], but the bulk of that work has used neuropathic models based on peripheral nerve injury. In the absence of frank nerve injury, there may be limited opportunity for peripheral immune cells to migrate across

the blood-brain barrier to influence spinal signalling—and indeed, we have no evidence of nerve injury in our participants. Since SH relies on a heterotopic long term potentiation-like effect in the spinal cord [41; 66], low concordance between peripheral and central IR would result in our missing a relationship. Similarly, *in vivo* endotoxin has been shown to enhance allodynia (which is also heterotopically mediated) and pain sensitivity in proportion to both endotoxin dose and *in vivo* cytokine expression [30; 96]—but again, systemic endotoxaemia increases permeability of the blood-brain barrier to an extent that may not be reflected in our participants. Others have noted that inflammation alone may not translate to changes in pain sensitivity, although it does seem to prime the system for a greater response to subsequent neural challenge [96]. Here, we suggest that the converse may also be true: *in vivo* inflammation (which was not modelled in this study) may be required to unmask the effects of a primed peripheral inflammatory response on central neural reactivity. A second possibility links to our previous consideration of exposure-driven shaping of inflammatory reactivity. Environmental exposures that are restricted to the peripheral nervous system would effectively reduce the concordance between peripheral and central immune responses, thus reducing the sensitivity of our approach to detect the aspects of inflammatory reactivity that would be most relevant to distress, induced secondary hyperalgesia, and persistent pain. A final possibility is that neural reactivity is somatotopic, given that one imaging study has reported glial upregulation reflecting the individualised distributions of clinical low back pain [51]. We induced SH on a pain-free forearm to minimise risk of exacerbating clinical pain in our participants with persistent pain. Therefore, our study would not have captured somatotopic differences in central neural reactivity.

## **Future directions**

The current work highlights our limited understanding of the true relationship between distress and pain. Distress is clearly robustly associated with pain, but that association could plausibly be one of predisposition, initiation, perpetuation, exacerbation, or a combination of these. Achieving a granular understanding of the relationship between distress and pain will

likely require at least two strategies: carefully timed longitudinal assessments of clinical distress and pain, positioned alongside systematic experimental manipulation of each variable (and potential mechanisms) to tease apart this relationship and identify and assess other factors that may confound, adjust, or strengthen it [16].

This work also highlights important missing pieces in the puzzle of HIV-associated pain: the roles of the immune system, neural reactivity, and psychoneuroimmune interactions in nociception and pain, and the potential modulating role of social and environmental context. Outside the particular case of neuropathic pain, few studies have directly investigated inflammatory signalling related to HIV-associated pain in humans [19; 50; 61; 99], and none was conducted in sub-Saharan Africa, which homes the vast majority of people with HIV. Meaningful progress in understanding and addressing HIV-associated pain will require a whole-person, cross-systems perspective that acknowledges social, psychological, and biological influences on both nociception and pain [59]. Emerging knowledge that health and wellbeing are powerfully shaped by the context in which people live highlights both the need to collect context-clarifying data and the relevance of undertaking research within the groups most affected by health problems. For HIV-associated pain, it will be important to prioritise mechanistic research in sub-Saharan African groups so that clinical interventions are built upon mechanistic frameworks that are contextually informed and accurate.

There are also opportunities to use a different approach to studying inflammatory signalling in relation to distress and persistent pain. A less potent immune challenge than endotoxin (such as vaccines, see [4]) could capture more subtle inter-individual differences in inflammatory responding, especially to non-invasive primers such as distress. Alternatively, considering the persistent inflammatory provocation from residual components of suppressed HIV [18; 75], assessing unprovoked cytokine expression could be productive. There also remains a need to understand anti-inflammatory cytokine activity (e.g. IL10 and

IL4) and to capture a broader range of the many cytokines involved in the inflammatory signalling cascade, in relation to persistent pain.

## Limitations

The current study was cross-sectional and unable to directly clarify directionality. In addition, our analysis controlled for several potential confounders, but we were unable to control for sleep problems although sleep is related to both distress and pain and may be involved in their relationship [73]. Our use of *in vitro* modelling of cytokine expression serves the pragmatic necessity of reducing variability due to factors such as diurnal rhythms, but cannot capture all the negative physiological controls that shape inflammatory signalling *in vivo*. A model that captures real-time physiological controls, such as microbial and other peripheral or central immune components that shape the innate immune response [71], could yield different results. Finally, the proportion of samples with IL-6 levels out of the range of the assay warrants cautious interpretation of those data.

## Conclusion

This cross-sectional study in people living with suppressed HIV found a positive association between psychological distress and three measures of persistent pain, but did not confirm an association between distress and an *in vitro* indicator of inflammatory reactivity. It also did not confirm an association between induced SH and inflammatory reactivity. The precise relationship between distress and pain and its potential underlying mechanisms, remain to be clarified. Given the complex interplay between variables and the systems involved in nociception and pain, a cross-systems perspective is likely to be the most productive approach to this line of inquiry.

## Acknowledgements

We thank Andiswa Gidana and Yoliswa Mtingeni for collecting data, and Andiswa Siyoko and Nomvula Mdwaba for recruiting participants. We thank Sarah Pedretti (University of Cape Town Lung Institute) for training and practical support with handling and storage of blood samples, Kessie Govender (Cape Peninsula University of Technology) for making the electrodes, Mathijs Franssen (KU Leuven) for research support with the SH procedure, and Peter Kamerman (University of the Witwatersrand) for his reflections on our statistical approach and interpretations.



## References

- [1] Albrecht D, Kim M, Torrado-Carvajal A, Akeju O, Edwards R, Wasan A, Zhang Y, Bergan C, Protsenko E, Hooker J, Napadow V, Loggia M. Glial activation in chronic back pain: replication of the original observation and association with negative affect. *The Journal of Pain* 2018;19(3):S2.
- [2] Albrecht DS, Kim M, Akeju O, Torrado-Carvajal A, Edwards RR, Zhang Y, Bergan C, Protsenko E, Kucyi A, Wasan AD, Hooker JM, Napadow V, Loggia ML. The neuroinflammatory component of negative affect in patients with chronic pain. *Mol Psychiatry* 2021;26(3):864-874.
- [3] Bates D, Maechler M, Bolker B, Walker S. Fitting Linear Mixed-Effects Models Using lme4. *J Stat Softw* 2015;67(1):1-48.
- [4] Bedwell G, Mqadi L, Kamerman P, Hutchinson M, Parker R, Madden V. Inflammatory reactivity is unrelated to childhood adversity or provoked modulation of nociception. *medRxiv [Preprint]* 2024.
- [5] Blyth FM, March LM, Brnabic AJM, Jorm LR, Williamson M, Cousins MJ. Chronic pain in Australia: a prevalence study. *Pain* 2001;89(2-3):127-134.
- [6] Brooks ME, Kristensen K, Van Benthem KJ, Magnusson A, Berg CW, Nielsen A, Skaug HJ, Machler M, Bolker BM. glmmTMB balances speed and flexibility among packages for zero-inflated generalized linear mixed modeling. *The R journal* 2017;9(2):378-400.
- [7] Brooks ME, Kristensen K, van Benthem KJ, Magnusson A, Berg CW, Nielsen A, Skaug HJ, Maechler M, Bolker BM. glmmTMB Balances Speed and Flexibility Among Packages for Zero-inflated Generalized Linear Mixed Modeling. *The R Journal* 2017;9(2):378-400-378-400.
- [8] Burke AL, Mathias JL, Denson LA. Psychological functioning of people living with chronic pain: a meta-analytic review. *Br J Clin Psychol* 2015;54(3):345-360.
- [9] Bürkner P-C. Advanced Bayesian multilevel modeling with the R package brms. *arXiv preprint arXiv:170511123* 2017.
- [10] Bürkner P-C. brms: An R package for Bayesian multilevel models using Stan. *Journal of statistical software* 2017;80:1-28.
- [11] Bürkner P-C. brms: An R Package for Bayesian Multilevel Models Using Stan. *Journal of Statistical Software* 2017;80(1):1-28-21-28.
- [12] Bürkner P-C. Advanced Bayesian Multilevel Modeling with the R Package brms. *The R Journal* 2018;10(1):395-411-395-411.
- [13] Bürkner P-C. Bayesian Item Response Modeling in R with brms and Stan. *Journal of Statistical Software* 2021;100(5):1-54-51-54.
- [14] Cauty A, Ripley BD. *boot: Bootstrap R (S-Plus) Functions*, 2022.
- [15] Croft PR, Lewis M, Papageorgiou AC, Thomas E, Jayson MIV, Macfarlane GJ, Silman AJ. Risk factors for neck pain: a longitudinal study in the general population. *Pain* 2001;93(3):317-325.
- [16] Crombez G, Veirman E, Van Ryckeghem D, Scott W, De Paepe A. The effect of psychological factors on pain outcomes: lessons learned for the next generation of research. *Pain Rep* 2023;8(6):e1112.
- [17] Davison AC, and D. V. Hinkley. *Bootstrap Methods and Their Applications*. Cambridge: Cambridge University Press, 1997.
- [18] Denton PW, Søgaard OS, Tolstrup M. Impacts of HIV Cure Interventions on Viral Reservoirs in Tissues. *Front Microbiol* 2019;10:1956.
- [19] Derry-Vick HM, Johnston CD, Brennan-Ing M, Burchett CO, Glesby N, Zhu YS, Siegler EL, Glesby MJ. Pain Is Associated With Depressive Symptoms, Inflammation, and Poorer Physical Function in Older Adults With HIV. *Psychosomatic medicine* 2022;84(8):957-965.

- [20] Dessauvagie AS, Jörns-Presentati A, Napp AK, Stein DJ, Jonker D, Breet E, Charles W, Swart RL, Lahti M, Suliman S, Jansen R, van den Heuvel LL, Seedat S, Groen G. The prevalence of mental health problems in sub-Saharan adolescents living with HIV: a systematic review. *Glob Ment Health (Camb)* 2020;7:e29.
- [21] Edwards RR, Dworkin RH, Sullivan MD, Turk DC, Wasan AD. The Role of Psychosocial Processes in the Development and Maintenance of Chronic Pain. *J Pain* 2016;17(9 Suppl):T70-92.
- [22] Fumaz CR, Gonzalez-Garcia M, Borrás X, Muñoz-Moreno JA, Perez-Alvarez N, Mothe B, Brander C, Ferrer MJ, Puig J, Llano A, Fernandez-Castro J, Clotet B. Psychological stress is associated with high levels of IL-6 in HIV-1 infected individuals on effective combined antiretroviral treatment. *Brain, behavior, and immunity* 2012;26(4):568-572.
- [23] Gabry J, Češnovar R, Johnson A, Bröder S. cmdstan: R Interface to 'CmdStan', 2024.
- [24] Grace PM, Rolan PE, Hutchinson MR. Peripheral immune contributions to the maintenance of central glial activation underlying neuropathic pain. *Brain, behavior, and immunity* 2011;25(7):1322-1332.
- [25] Harpham T, Reichenheim M, Oser R, Thomas E, Hamid N, Jaswal S, Ludermir A, Aidoo M. Measuring mental health in a cost-effective manner. *Health Policy Plan* 2003;18(3):344-349.
- [26] Harvie DS, Broecker M, Smith RT, Meulders A, Madden VJ, Moseley GL. Bogus visual feedback alters onset of movement-evoked pain in people with neck pain. *Psychol Sci* 2015;26(4):385-392.
- [27] Harvie DS, Meulders A, Madden VJ, Hillier SL, Peto DK, Brinkworth R, Moseley GL. When touch predicts pain: predictive tactile cues modulate perceived intensity of painful stimulation independent of expectancy. *Scand J Pain* 2016;11:11-18.
- [28] Heinzen E, Jason Sinnwell, Elizabeth Atkinson, Tina Gunderson, and Gregory Dougherty. arsenal: An Arsenal of "R" Functions for Large-Scale Statistical Summaries, 2021.
- [29] Hendry LM, Wadley AL, Cherry CL, Price P, Lombard Z, Kamerman PR. TNF Block Gene Variants Associate With Pain Intensity in Black Southern Africans With HIV-associated Sensory Neuropathy. *The Clinical journal of pain* 2016;32(1):45-50.
- [30] Hutchinson MR, Buijs M, Tuke J, Kwok YH, Gentgall M, Williams D, Rolan P. Low-dose endotoxin potentiates capsaicin-induced pain in man: evidence for a pain neuroimmune connection. *Brain, behavior, and immunity* 2013;30:3-11.
- [31] Imai K, Keele L, Tingley D. A General Approach to Causal Mediation Analysis. *Psychological Methods* 2010;15(4):309–334-309–334.
- [32] Imai K, Keele L, Tingley D, Yamamoto T. Causal Mediation Analysis Using R. In: HD Vinod, editor. *Advances in Social Science Research Using R*: Springer-Verlag, 2010.
- [33] Imai K, Keele L, Tingley D, Yamamoto T. Unpacking the Black Box of Causality: Learning about Causal Mechanisms from Experimental and Observational Studies. *American Political Science Review* 2011;105(4):765–789-765–789.
- [34] Imai K, Keele L, Yamamoto T. Identification, Inference, and Sensitivity Analysis for Causal Mediation Effects. *Statistical Science* 2010;25(1):51–71-51–71.
- [35] Imai K, Yamamoto T. Identification and Sensitivity Analysis for Multiple Causal Mechanisms: Revisiting Evidence from Framing Experiments. *Political Analysis* 2013;21(2):141–171-141–171.
- [36] Iyar MM, Kealy D, Giannone Z, Ogrodniczuk J, Abbass A, Joyce AS. Where does it hurt? Location of pain, psychological distress, and alexithymia among outpatients seeking psychotherapy. *Int J Psychiatry Clin Pract* 2019;23(4):293-296.
- [37] Kagee A. Psychological distress among persons living with HIV, hypertension, and diabetes. *AIDS care* 2010;22(12):1517-1521.
- [38] Kagee A, Saal W, Bantjes J. Distress, depression and anxiety among persons seeking HIV testing. *AIDS care* 2017;29(3):280-284.
- [39] Kang S, Van Ryckeghem DML, Vlaeyen JWS, De Paepe AL, Crombez G. In search of conditioned pain: an experimental analysis. *Pain* 2023;164(11):2596-2605.

- [40] Kay M. tidybayes: Tidy Data and Geoms for Bayesian Models, 2023.
- [41] Klein T, Magerl W, Hopf H-C, Sandkühler J, Treede R-D. Perceptual Correlates of Nociceptive Long-Term Potentiation and Long-Term Depression in Humans. *The Journal of Neuroscience* 2004;24(4):964-971.
- [42] Kovarik JJ, Tillinger W, Hofer J, Hölzl MA, Heinzl H, Saemann MD, Zlabinger GJ. Impaired anti-inflammatory efficacy of n-butyrate in patients with IBD. *Eur J Clin Invest* 2011;41(3):291-298.
- [43] Kowalski ML, Wolska A, Grzegorzczak J, Hilt J, Jarzebska M, Drobniowski M, Synder M, Kurowski M. Increased responsiveness to toll-like receptor 4 stimulation in peripheral blood mononuclear cells from patients with recent onset rheumatoid arthritis. *Mediators Inflamm* 2008;2008:132732.
- [44] Kuznetsova A, Brockhoff PB, Christensen RHB. ImerTest Package: Tests in Linear Mixed Effects Models. *Journal of Statistical Software* 2017;82(13):1-26.
- [45] Kwok YH, Hutchinson MR, Gentgall MG, Rolan PE. Increased responsiveness of peripheral blood mononuclear cells to in vitro TLR 2, 4 and 7 ligand stimulation in chronic pain patients. *PLoS One* 2012;7(8):e44232.
- [46] Kwok YH, Tuke J, Nicotra LL, Grace PM, Rolan PE, Hutchinson MR. TLR 2 and 4 responsiveness from isolated peripheral blood mononuclear cells from rats and humans as potential chronic pain biomarkers. *PLoS One* 2013;8(10):e77799.
- [47] Lawrence IKL. A Concordance Correlation Coefficient to Evaluate Reproducibility. *Biometrics* 1989;45(1):255-268.
- [48] Lawrence IKL. Correction: A Note on the Concordance Correlation Coefficient. *Biometrics* 2000;56(1):324-325.
- [49] Lerman SF, Rudich Z, Brill S, Shalev H, Shahar G. Longitudinal associations between depression, anxiety, pain, and pain-related disability in chronic pain patients. *Psychosomatic medicine* 2015;77(3):333-341.
- [50] Liu X, Bae C, Gelman BB, Chung JM, Tang SJ. A neuron-to-astrocyte Wnt5a signal governs astrogliosis during HIV-associated pain pathogenesis. *Brain* 2022;145(11):4108-4123.
- [51] Loggia ML, Chonde DB, Akeju O, Arabasz G, Catana C, Edwards RR, Hill E, Hsu S, Izquierdo-Garcia D, Ji R-R, Riley M, Wasan AD, Zürcher NR, Albrecht DS, Vangel MG, Rosen BR, Napadow V, Hooker JM. Evidence for brain glial activation in chronic pain patients. *Brain* 2015;138(3):604-615.
- [52] Loy A, Steele S, Korobova J. Imeresampler: Bootstrap Methods for Nested Linear Mixed-Effects Models, 2023.
- [53] Lundqvist C, Benth JS, Grande RB, Aaseth K, Russell MB. A vertical VAS is a valid instrument for monitoring headache pain intensity. *Cephalalgia* 2009;29(10):1034-1041.
- [54] Ma H, Zhu F, Zhai H, Ma Y, Liu Y, Wang S, Xu Y. Prevalence of psychological distress among people living with HIV/AIDS: a systematic review and meta-analysis. *AIDS care* 2023;35(2):153-164.
- [55] Madden VJ. Pain by association? Investigations of classically conditioned pain. School of Health Sciences, Vol. PhD. Adelaide: University of South Australia, 2016.
- [56] Madden VJ, Msolo N, Mqadi L, Lesosky M, Bedwell GJ, Hutchinson MR, Peter JG, Parker R, Schrepf A, Edwards RR, Joska JA. Study protocol: an observational study of distress, immune function and persistent pain in HIV. *BMJ open* 2022;12(6).
- [57] McBeth J, Macfarlane GJ, Silman AJ. Does chronic pain predict future psychological distress? *Pain* 2002;96(3):239-245.
- [58] McMillan AS, Wong MC, Zheng J, Luo Y, Lam CL. Widespread pain symptoms and psychological distress in southern Chinese with orofacial pain. *J Oral Rehabil* 2010;37(1):2-10.
- [59] Merlin JS, Hamm M, de Abril Cameron F, Baker V, Brown DA, Cherry CL, Edelman EJ, Evangeli M, Harding R, Josh J, Kemp HI, Lichius C, Madden VJ, Nkhoma K, O'Brien KK, Parker R, Rice A, Robinson-Papp J, Sabin CA, Slawek D, Scott W, Tsui JJ, Uebelacker LA, Wadley AL, Goodin BR. The Global Task Force for Chronic Pain in

- People with HIV (PWH): Developing a research agenda in an emerging field. *AIDS care* 2023;35(8):1215-1223.
- [60] Merlin JS, Walcott M, Ritchie C, Herbey I, Kertesz SG, Chamot E, Saag M, Turan JM. 'Two Pains Together': Patient Perspectives on Psychological Aspects of Chronic Pain while Living with HIV. *PLOS ONE* 2014;9(11):e111765.
- [61] Merlin JS, Westfall AO, Heath SL, Goodin BR, Stewart JC, Sorge RE, Younger J. Brief Report: IL-1 $\beta$  Levels Are Associated With Chronic Multisite Pain in People Living With HIV. *JAIDS Journal of Acquired Immune Deficiency Syndromes* 2017;75(4):e99-e103.
- [62] Namisango E, Harding R, Atuhaire L, Ddungu H, Katabira E, Muwanika FR, Powell RA. Pain Among Ambulatory HIV/AIDS Patients: Multicenter Study of Prevalence, Intensity, Associated Factors, and Effect. *The Journal of Pain* 2012;13(7):704-713.
- [63] Parker R, Jelsma J, Stein DJ. Pain in amaXhosa Women Living With HIV/AIDS: Translation and Validation of the Brief Pain Inventory–Xhosa. *Journal of Pain and Symptom Management* 2016;51(1):126-132.e122.
- [64] Parker R, Stein DJ, Jelsma J. Pain in people living with HIV/AIDS: a systematic review. *Journal of the International AIDS Society* 2014;17(1):18719.
- [65] Passos IC, Vasconcelos-Moreno MP, Costa LG, Kunz M, Brietzke E, Quevedo J, Salum G, Magalhães PV, Kapczinski F, Kauer-Sant'Anna M. Inflammatory markers in post-traumatic stress disorder: a systematic review, meta-analysis, and meta-regression. *The Lancet Psychiatry* 2015;2(11):1002-1012.
- [66] Patel R, Taylor JL, Dickenson AH, McMahan SB, Bannister K. A back-translational study of descending interactions with the induction of hyperalgesia by high-frequency electrical stimulation in rats and humans. *Pain* 2024;165(9):1978-1989.
- [67] Peterson BG, Carl P. *PerformanceAnalytics: Econometric Tools for Performance and Risk Analysis*, 2020.
- [68] Pincus T, Burton AK, Vogel S, Field AP. A Systematic Review of Psychological Factors as Predictors of Chronicity/Disability in Prospective Cohorts of Low Back Pain. *Spine* 2002;27(5):E109-E120.
- [69] Povshedna T, Swann SA, Levy SLA, Campbell AR, Choinière M, Durand M, Price C, Gill P, Murray MCM, Côté HCF. Global Prevalence of Chronic Pain in Women with HIV: A Systematic Review and Meta-analysis. *Open Forum Infect Dis* 2023;10(8):ofad350.
- [70] R Core Team. *R: A Language and Environment for Statistical Computing*. Vienna: Austria: R Foundation for Statistical Computing, 2022.
- [71] Rook GAW. Evolution and the critical role of the microbiota in the reduced mental and physical health associated with low socioeconomic status (SES). *Neuroscience and biobehavioral reviews* 2024;161:105653.
- [72] Runsten S, Korkeila K, Koskenvuo M, Rautava P, Vainio O, Korkeila J. Can social support alleviate inflammation associated with childhood adversities? *Nord J Psychiatry* 2014;68(2):137-144.
- [73] Sabin CA, Okhai H, Dhairyawan R, Haag K, Burns F, Gilson R, Sherr L, Tariq S. Prevalence of pain in women living with HIV aged 45-60: associated factors and impact on patient-reported outcomes. *AIDS care* 2023;35(8):1181-1190.
- [74] Salomons TV, Moayed M, Erpelding N, Davis KD. A brief cognitive-behavioural intervention for pain reduces secondary hyperalgesia. *PAIN®* 2014;155(8):1446-1452.
- [75] Sari H, Galbusera R, Bonnier G, Lin Y, Alshelh Z, Torrado-Carvajal A, Mukerji SS, Ratai EM, Gandhi RT, Chu JT, Akeju O, Orhurhu V, Salvatore AN, Sherman J, Kwon DS, Walker B, Rosen B, Price JC, Pollak LE, Loggia ML, Granziera C. Multimodal Investigation of Neuroinflammation in Aviremic Patients With HIV on Antiretroviral Therapy and HIV Elite Controllers. *Neurol Neuroimmunol Neuroinflamm* 2022;9(2).
- [76] Scheiermann C, Gibbs J, Ince L, Loudon A. Clocking in to immunity. *Nat Rev Immunol* 2018;18(7):423-437.
- [77] Schrepf A, Bradley CS, O'Donnell M, Luo Y, Harte SE, Kreder K, Lutgendorf S. Toll-like Receptor 4 and comorbid pain in Interstitial Cystitis/Bladder Pain Syndrome: A



- Multidisciplinary Approach to the Study of Chronic Pelvic Pain research network study. *Brain, Behavior, and Immunity* 2015;49:66-74.
- [78] Schrepf A, Kaplan C, Harris RE, Williams DA, Clauw DJ, As-Sanie S, Till S, Clemens JQ, Rodriguez LV, Van Bokhoven A, Landis R, Gallop R, Bradley C, Naliboff B, Pontari M, O'Donnell M, Luo Y, Kreder K, Lutgendorf SK, Harte SE. Stimulated whole-blood cytokine/chemokine responses are associated with interstitial cystitis/bladder pain syndrome phenotypes and features of nociplastic pain: a multidisciplinary approach to the study of chronic pelvic pain research network study. *Pain* 2023;164(5):1148-1157.
- [79] Schrepf A, O'Donnell M, Luo Y, Bradley CS, Kreder K, Lutgendorf S. Inflammation and inflammatory control in interstitial cystitis/bladder pain syndrome: Associations with painful symptoms. *Pain* 2014;155(9):1755-1761.
- [80] Scott W, Arkuter C, Kioskli K, Kemp H, McCracken LM, Rice ASC, de CWAC. Psychosocial factors associated with persistent pain in people with HIV: a systematic review with meta-analysis. *Pain* 2018;159(12):2461-2476.
- [81] Scott W, Garcia Calderon Mendoza Del Solar M, Kemp H, McCracken LM, A CdCW, Rice ASC. A qualitative study of the experience and impact of neuropathic pain in people living with HIV. *Pain* 2020;161(5):970-978.
- [82] Shi Y, Gelman BB, Lisinicchia JG, Tang S-J. Chronic-Pain-Associated Astrocytic Reaction in the Spinal Cord Dorsal Horn of Human Immunodeficiency Virus-Infected Patients. *The Journal of Neuroscience* 2012;32(32):10833-10840.
- [83] Speer K, Upton D, Semple S, McKune A. Systemic low-grade inflammation in post-traumatic stress disorder: a systematic review. *J Inflamm Res* 2018;11:111-121.
- [84] Spruyt A, Clarysse J, Vansteenwegen D, Baeyens F, Hermans D. *Affect 4.0*. *Experimental psychology* 2009;57:36-45.
- [85] Statistics South Africa. *South African National Census of 2011*. Pretoria, South Africa: Stats SA, 2012.
- [86] Stein DJ, Koen N, Donald KA, Adnams CM, Koopowitz S, Lund C, Marais A, Myers B, Roos A, Sorsdahl K, Stern M, Tomlinson M, van der Westhuizen C, Vythilingum B, Myer L, Barnett W, Brittain K, Zar HJ. Investigating the psychosocial determinants of child health in Africa: The Drakenstein Child Health Study. *Journal of neuroscience methods* 2015;252:27-35.
- [87] Stevenson M, Sergeant E, Firestone S. *epiR: Tools for the Analysis of Epidemiological Data*, 2024.
- [88] Team P. *RStudio: Integrated Development Environment for R*. Boston, MA: Posit Software, PBC, 2024.
- [89] Timmers I, Quaedflieg CWEM, Hsu C, Heathcote LC, Rovnaghi CR, Simons LE. The interaction between stress and chronic pain through the lens of threat learning. *Neuroscience & Biobehavioral Reviews* 2019;107:641-655.
- [90] Tingley D, Yamamoto T, Hirose K, Keele L, Imai K. *mediation: R Package for Causal Mediation Analysis*. *Journal of Statistical Software* 2014;59(5):1–38-31–38.
- [91] van der Windt D, Croft P, Penninx B. Neck and upper limb pain: more pain is associated with psychological distress and consultation rate in primary care. *J Rheumatol* 2002;29(3):564-569.
- [92] Vlaeyen JWS, Crombez G. Behavioral Conceptualization and Treatment of Chronic Pain. *Annual Review of Clinical Psychology* 2020;16(1):187-212.
- [93] Wadley AL, Hendry LM, Kamerman PR, Chew CS, Price P, Cherry CL, Lombard Z. Role of TNF block genetic variants in HIV-associated sensory neuropathy in black Southern Africans. *Eur J Hum Genet* 2015;23(3):363-368.
- [94] Waggoner SN. Circadian Rhythms in Immunity. *Curr Allergy Asthma Rep* 2020;20(1):2.
- [95] Watson PF, Petrie A. Method agreement analysis: A review of correct methodology. *Theriogenology* 2010;73(9):1167-1179.
- [96] Wegner A, Elsenbruch S, Maluck J, Grigoleit JS, Engler H, Jager M, Spreitzer I, Schedlowski M, Benson S. Inflammation-induced hyperalgesia: effects of timing,

- dosage, and negative affect on somatic pain sensitivity in human experimental endotoxemia. *Brain, behavior, and immunity* 2014;41:46-54.
- [97] Wickham H, Averick M, Bryan J, Chang W, McGowan L, François R, Grolemund G, Hayes A, Henry L, Hester J, Kuhn M, Pedersen T, Miller E, Bache S, Müller K, Ooms J, Robinson D, Seidel D, Spinu V, Takahashi K, Vaughan D, Wilke C, Woo K, Yutani H. Welcome to the Tidyverse. *J Open Source Softw* 2019;4(43).
- [98] Wolfaardt L, Mateane W, Kagee A. The factor structure of the Hopkins Symptom Checklist 25 among persons seeking HIV testing. *AIDS care* 2024;36(9):1350-1357.
- [99] Wu N, Kong H, Han L, Chen Y, Bai J, Liu Y. An Analysis of Biopsychosocial Factors Associated With Chronic Pain Severity Among Hospitalized People Living With HIV in Shenzhen, China: A Cross-Sectional Study. *J Assoc Nurses AIDS Care* 2024;35(1):51-59.
- [100] Zaman J, Madden VJ, Iven J, Wiech K, Weltens N, Ly HG, Vlaeyen JWS, Van Oudenhove L, Van Diest I. Biased Intensity Judgements of Visceral Sensations After Learning to Fear Visceral Stimuli: A Drift Diffusion Approach. *J Pain* 2017;18(10):1197-1208.
- [101] Zeileis A, Kleiber C, Jackman S. Regression Models for Count Data in R. *Journal of Statistical Software* 2008;27(8):1 - 25.

## Figure captions

Figure 1: Induction and assessment of secondary hyperalgesia; not to scale. Time is shown relative to the start of the induction. Threshold identification used an adaptive staircase [5] to determine the individual electrical detection threshold. Practice: Participants practised using a touch-based visual analogue scale (VAS) to rate each stimulus in the test battery for a maximum of two batteries. Induction: Five 1-second trains of 100Hz electrical stimulation (400V, pulse width 2000 $\mu$ s, square pulse shape; inter-train interval 9 seconds; DS7A constant current stimulator (Digitimer Limited, Hertfordshire, UK) and Affect5 software [85] at 10 times individual detection threshold [42], with VAS rating taken for each train. Break: Participant read unrelated material. Test battery: assessment of surface area and ratings to 5 modalities. Full details in [57]. Image created in BioRender. Madden, T. (2024) <https://BioRender.com/e15a892>.

Figure 2: Distress was positively associated with persistent pain severity (a) and the count of sites of persistent pain (b), but not with any of the 3 cytokines (c). Dots: observed data; line: predictions of adjusted linear regression model; grey ribbon: 95% CI for model-predicted values.

Figure 3: There was no evidence that cytokine expression had a linear relationship with (a) Persistent pain severity, (b) Count of painful sites, (c) magnitude of SH (represented here with within-participant mean of baseline rating subtracted from each post-induction rating) or (d) area of SH. Although the left panel of (b) suggests a possible association between IL1 $\beta$  expression and the count of sites of persistent pain, the null hypothesis was upheld. Dots: observed data; line: smoothed prediction of unadjusted linear regression; grey ribbon: 95% CI.

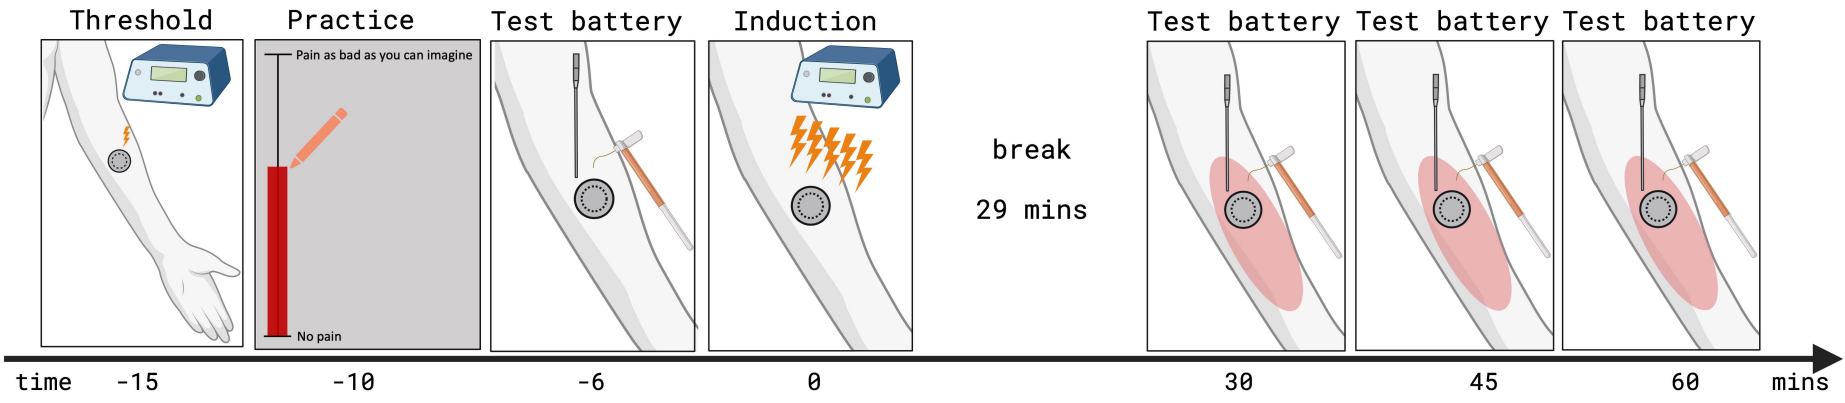



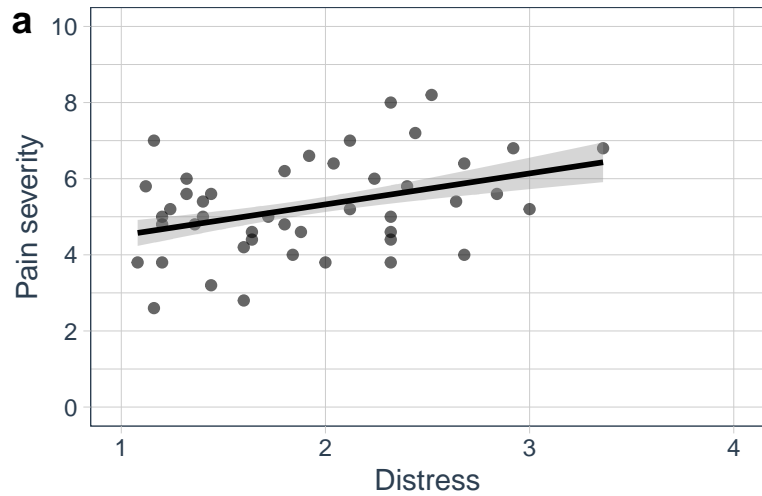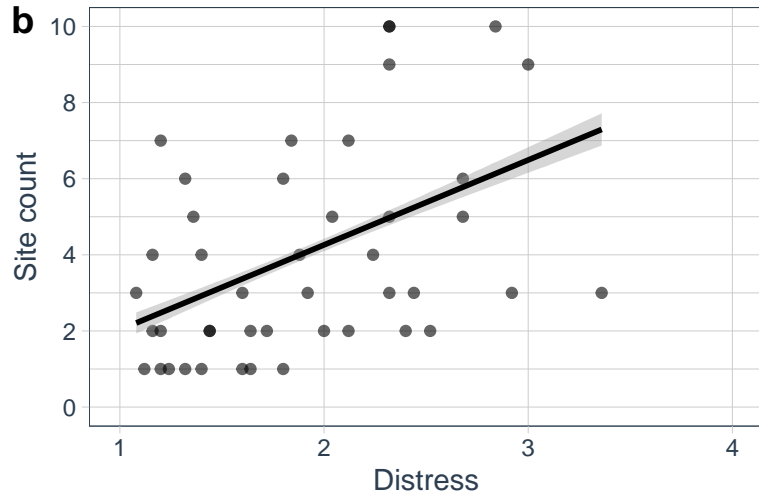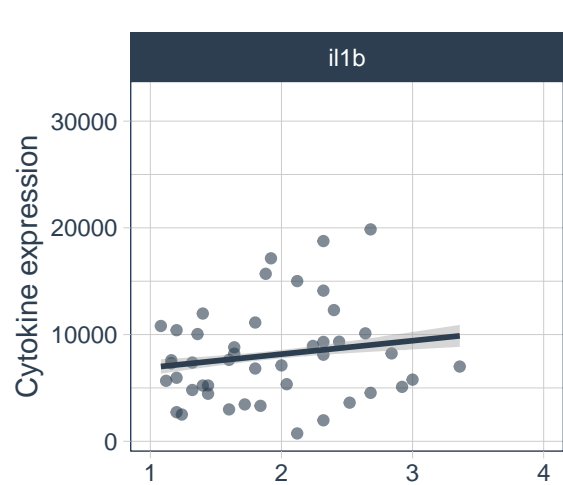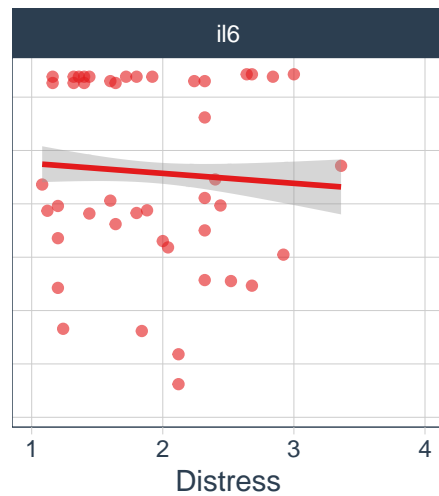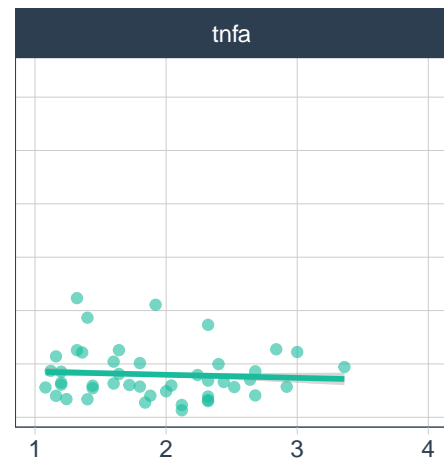

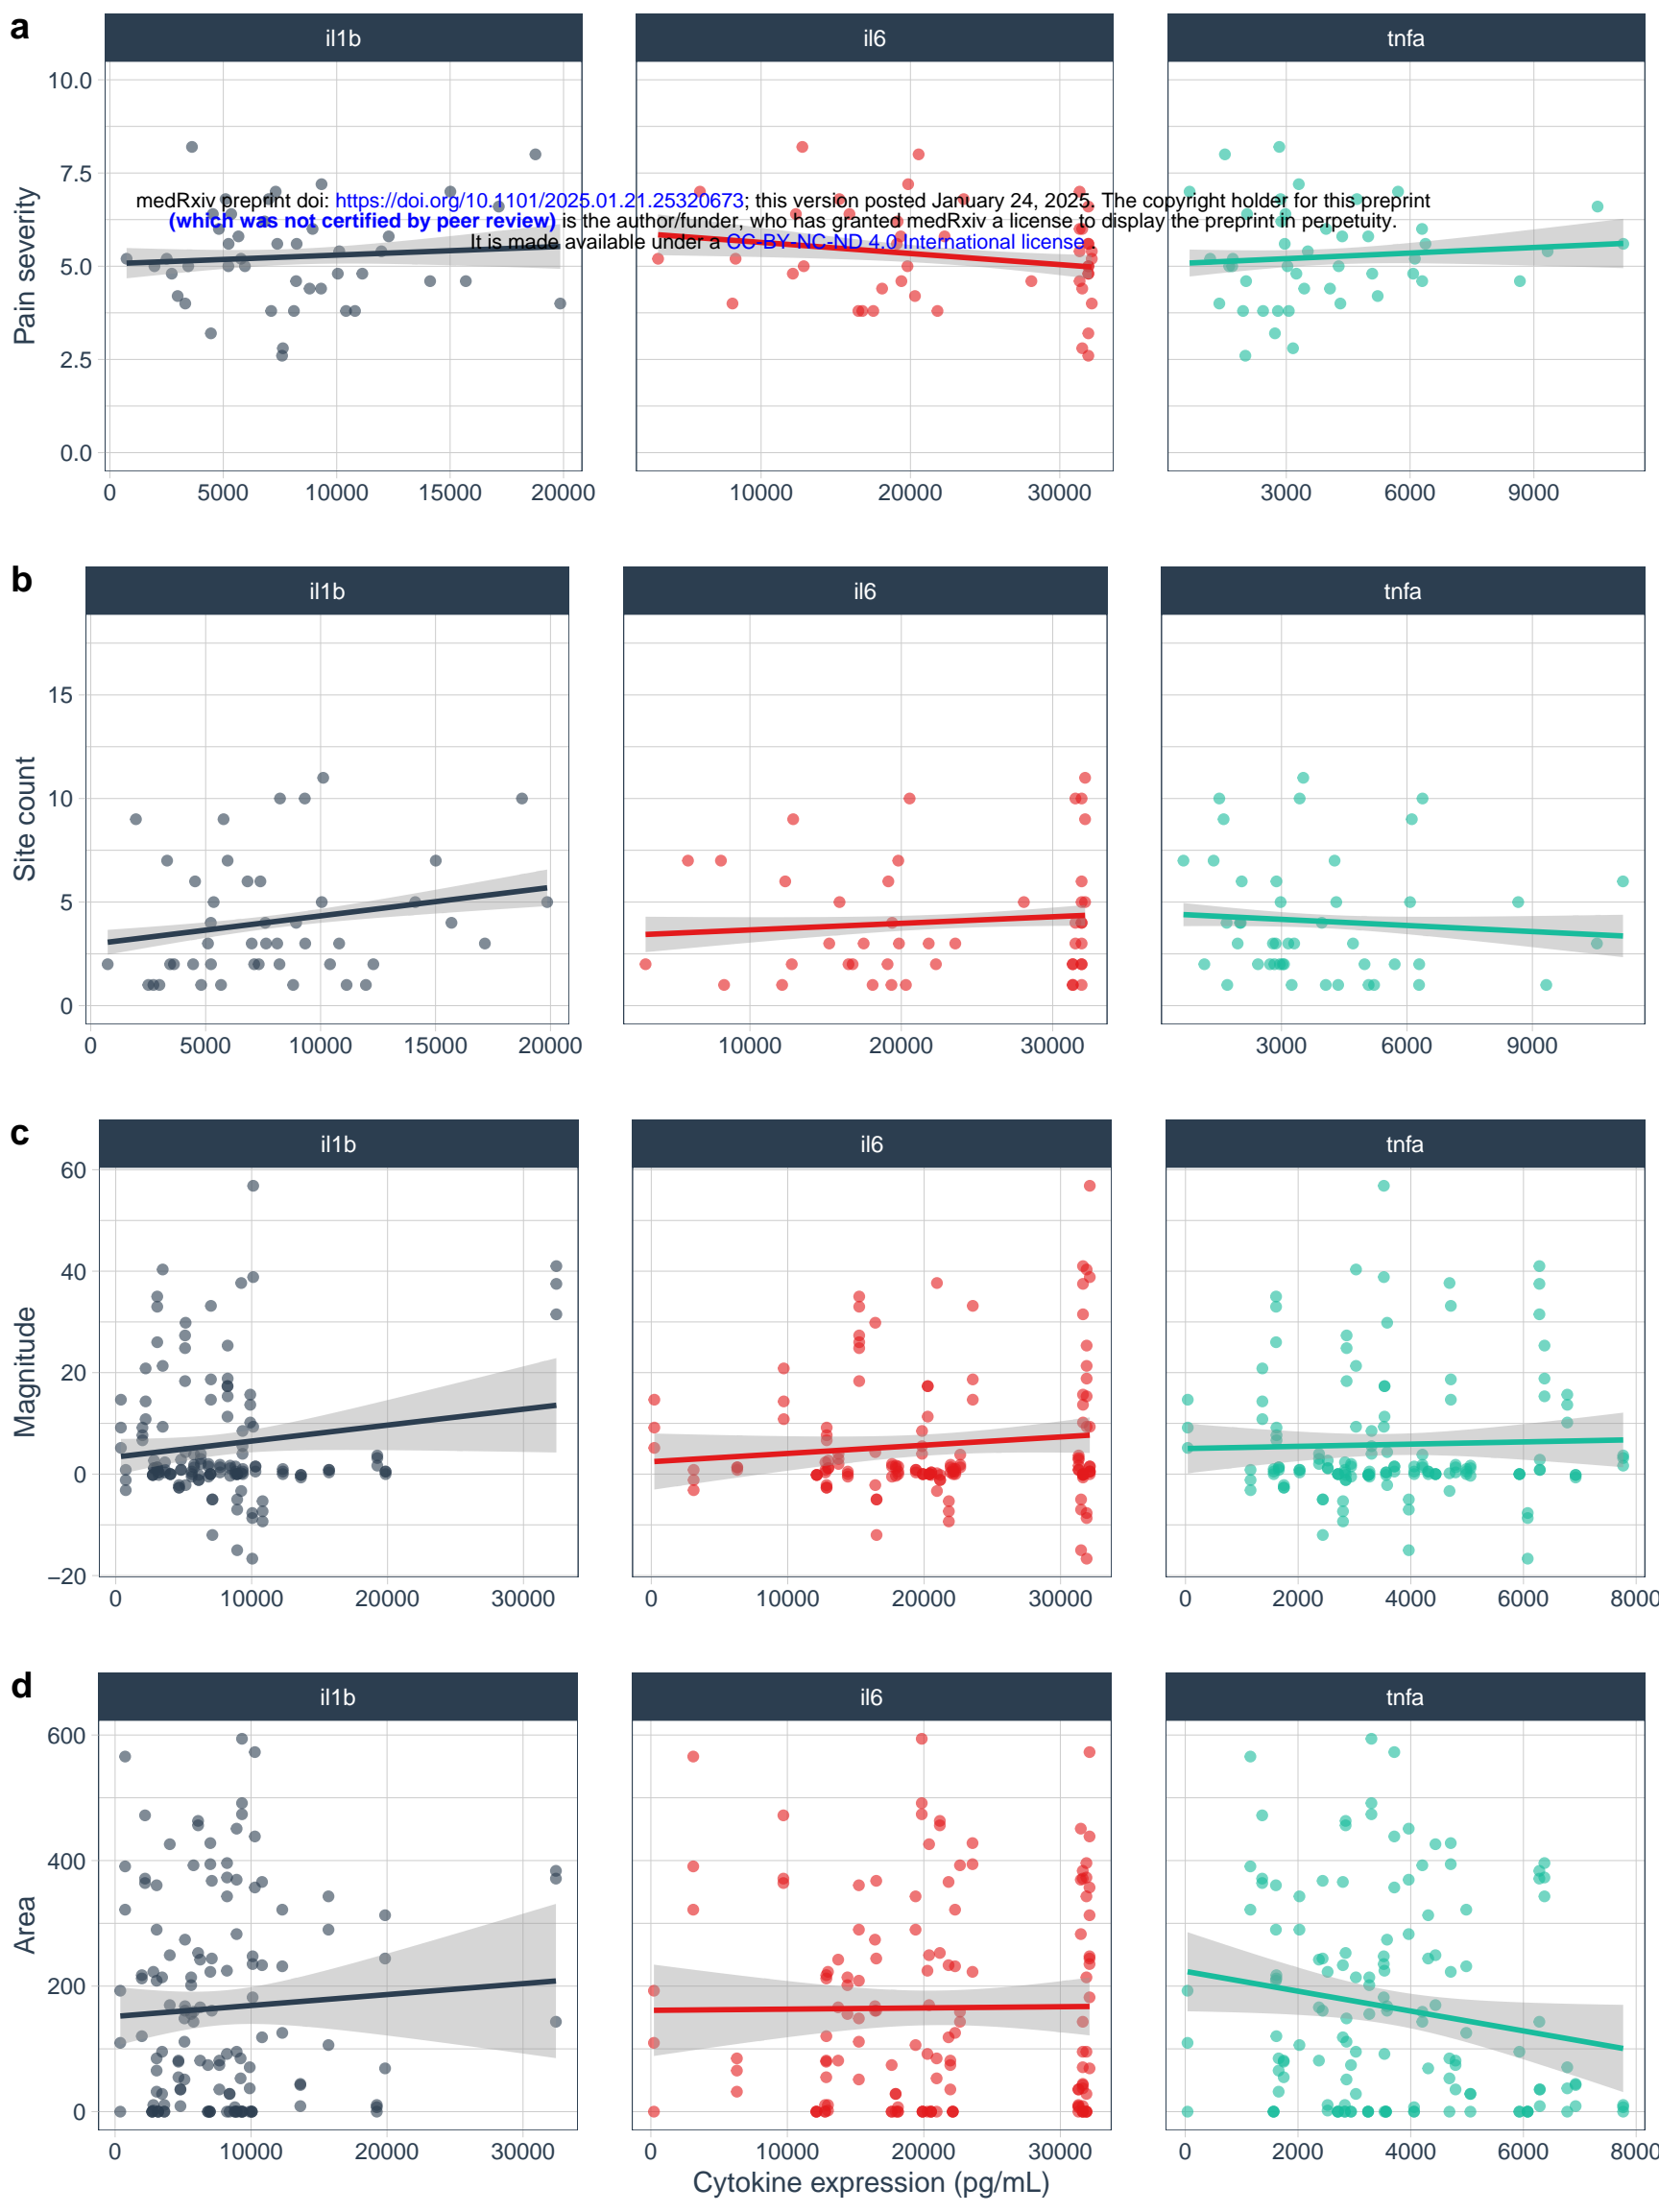

Source: https://medrxiv.org/content/medrxiv/early/2025/01/24/2025.01.21.25320673.full.pdf
